# Supplementary material for: The presence or severity of pulmonary hypertension does not affect outcomes for single-lung transplantation
Source: HighWire-hosted journal article supplement (doi:10.1136/thoraxjnl-2015-207354), 2015-11-30

Figure 2. Freedom from chronic lung allograft dysfunction (CLAD).

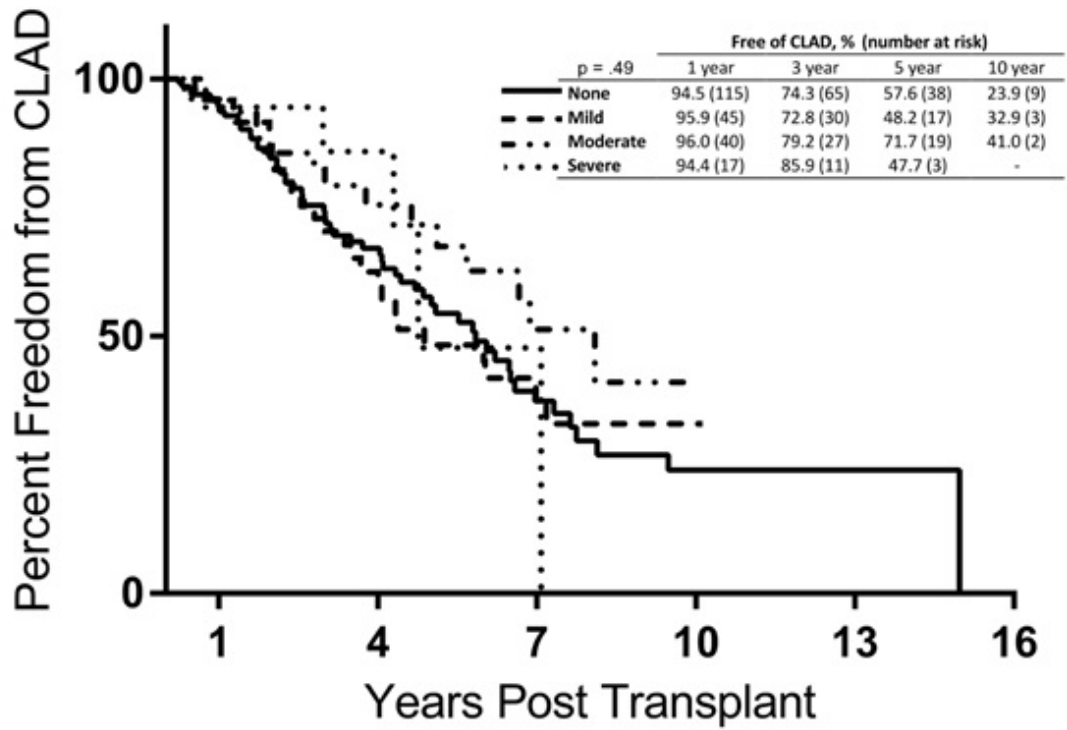

Figure 3. Recipient survival (Kaplan-Meier actuarial survival) using a threshold of 35 mm Hg for mPAP.

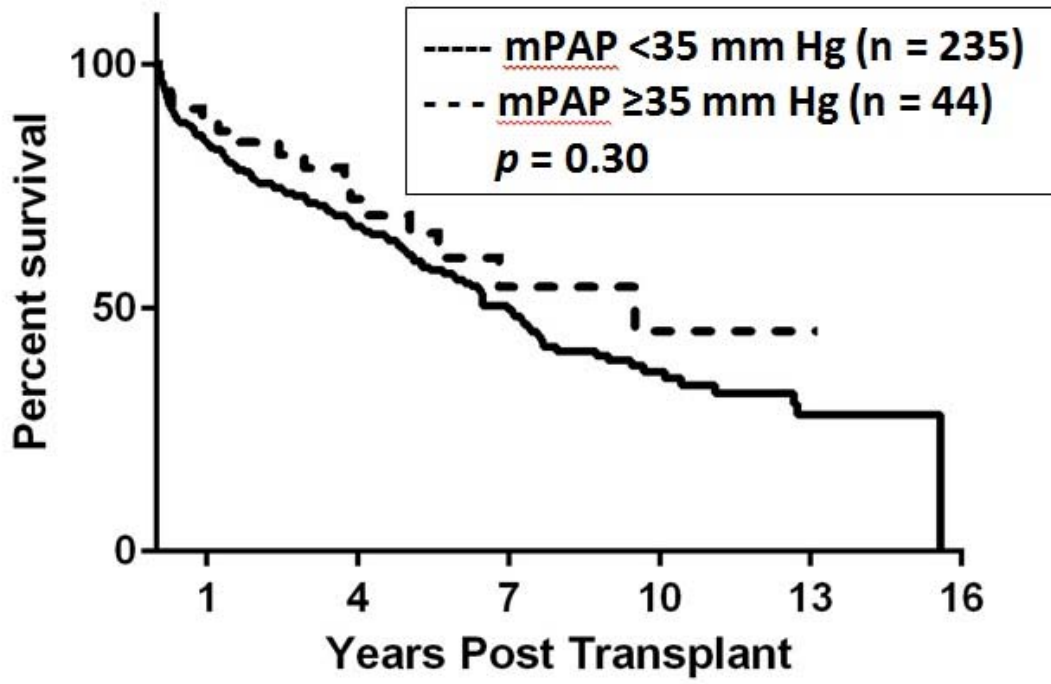

Supplement: thoraxjnl-2015-207354supp_figures.pdf [file thoraxjnl-2015-207354supp_figures.pdf]
